# Supplementary material for: Tailoring the electrical and photo-electrical properties of a WS2 field effect transistor by selective n-type chemical doping
Source: Royal Society of Chemistry journal article supplement (doi:10.1039/c6ra02390h), 2016-01-01
Supplement: c6ra02390h1.pdf [file c6ra02390h1.pdf]

## Supporting Information

### **Tailoring the electrical and Photo-electrical properties of WS<sub>2</sub> Field effect transistor by selective n-type chemical doping**

Muhammad Waqas Iqbal<sup>1\*</sup>, Muhammad Zahir Iqbal<sup>3,4</sup>, Muhammad Farooq Khan<sup>2</sup>,  
Muhammad Arshad Kamran<sup>1</sup>, Abdul Majid<sup>1</sup>, Thamer Alharbi<sup>1</sup>, Jonghwa Eom<sup>2</sup>

<sup>1</sup>Department of Physics, College of Science, Majmaah University, Al-Zulfi 11932, Saudi Arabia.

<sup>2</sup>Department of Physics and Graphene Research Institute, Sejong University, Seoul 143-747, Korea.

<sup>3</sup>Department of Physics & Astronomy, Georgia State University, Atlanta, Georgia 30303, USA

<sup>4</sup>Faculty of Engineering Sciences, GIK Institute of Engineering Sciences and Technology, Topi 23640, Pakistan

E-mail: mw.iqbal@mu.edu.sa

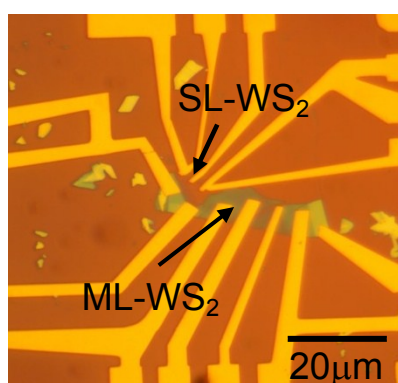

**Figure S1.** Optical image of mechanically exfoliated single-, multi-layer WS<sub>2</sub> films on Si/SiO<sub>2</sub> substrate with source-drain contacts.

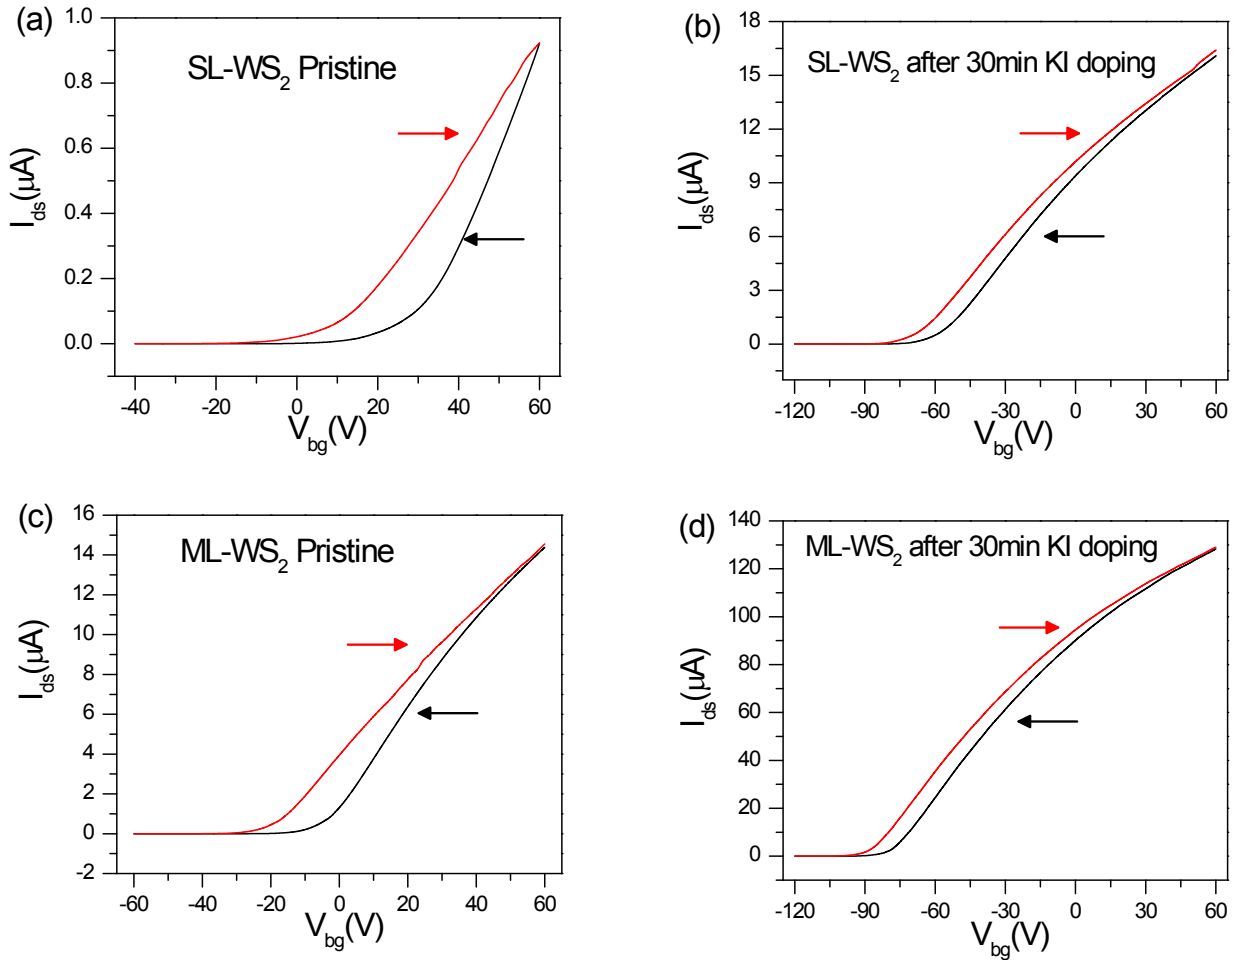

**Figure S2.** (a) Transfer characteristics ( $I_{ds}$ - $V_{bg}$ ) of the SL-WS<sub>2</sub> FET on SiO<sub>2</sub> substrate before KI doping, where the back gate voltage was swept continuously from -40 to +60 V and then from +60 V to -40 V. (b) Transfer characteristics ( $I_{ds}$ - $V_{bg}$ ) of the SL-WS<sub>2</sub> FET on SiO<sub>2</sub> substrate after 30 min KI doping, where the back gate voltage was swept continuously from -120 to +60 V and then from +60 V to -120 V. (c) Transfer characteristics of the ML-WS<sub>2</sub> FET on SiO<sub>2</sub> substrate before KI doping. (d) Transfer characteristics of the ML-WS<sub>2</sub> FET on SiO<sub>2</sub> substrate after 30 min KI doping. All the measurements were performed in vacuum at room temperature.

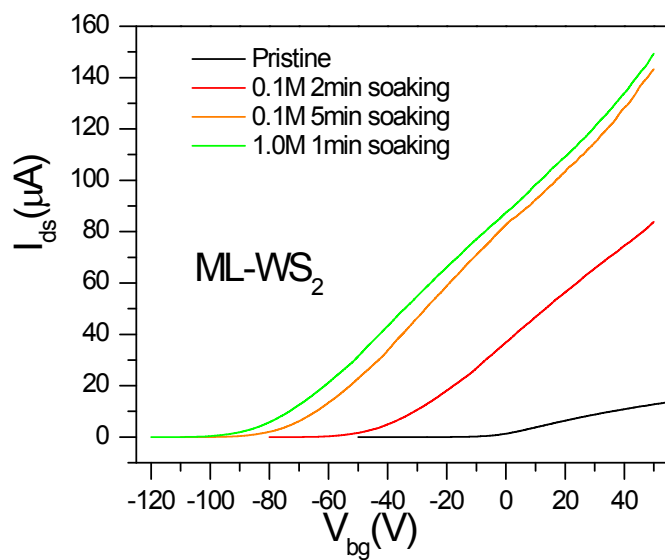

**Figure S3.** Transfer characteristics ( $I_{ds}$ - $V_{bg}$ ) of ML-WS<sub>2</sub> FET for different treatment times and with concentration 0.1M and 1.0M of KI.

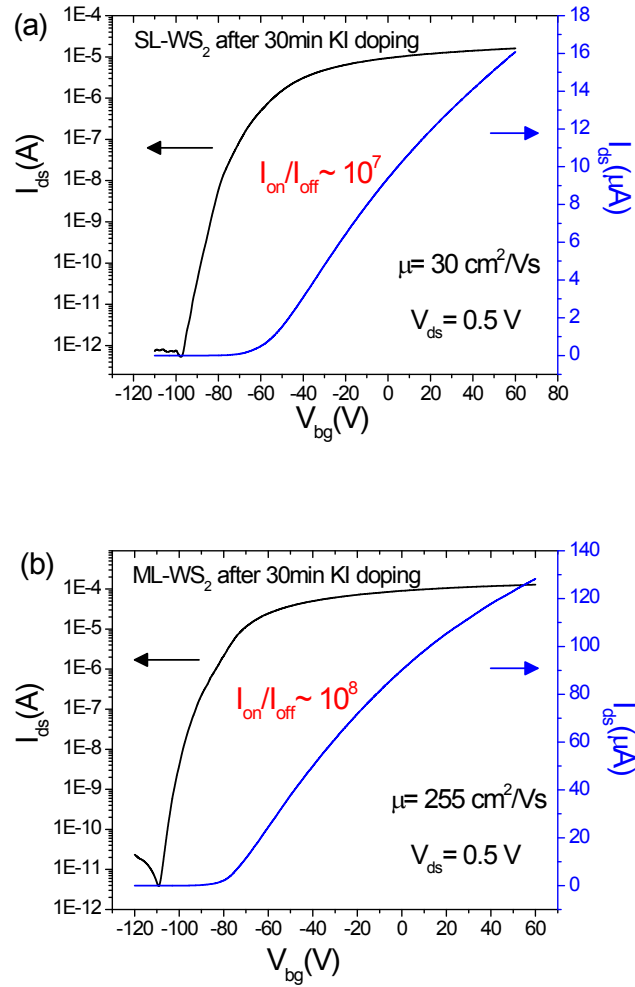

**Figure S4.** (a) Transfer characteristics ( $I_{ds}$ - $V_{bg}$ ) of the SL-WS<sub>2</sub> FET after 30 min KI doping, On/Off ratio of the device is  $\sim 10^7$ . (b) Transfer characteristics ( $I_{ds}$ - $V_{bg}$ ) of the ML-WS<sub>2</sub> FET after 30 min KI doping, On/Off ratio of the device is  $\sim 10^8$ .
